# Supplementary material for: Exploration of low-sulfonate lignin electrospinning conditions for the development of new renewable lubricant formulations
Source: Royal Society of Chemistry journal article supplement (doi:10.1039/d4nr04426f), 2025-01-01
Supplement: d4nr04426f1.pdf [file d4nr04426f1.pdf]

## *Supporting Information*

### **Exploration of low-sulfonate lignin electrospinning conditions for the development of new renewable lubricant formulations**

**José F. Rubio-Valle<sup>1</sup>, , Concepción Valencia<sup>1</sup>, Gethzemani M. Estrada-Villegas<sup>2</sup>,  
José E. Martín-Alfonso<sup>1</sup>, José M. Franco<sup>1</sup>**

*<sup>1</sup>Pro2TecS – Chemical Product and Process Technology Research Center. Department of Chemical Engineering and Materials Science. Universidad de Huelva. ETSI. Campus de “El Carmen”. 21071 Huelva. Spain.*

*<sup>2</sup>CONACYT-Centro de Investigación en Química Aplicada, Parque de Innovación e Investigación Tecnológica (PIIT), Apodaca 66628, México*

 Author to whom correspondence should be addressed:

Dr. J.F. Rubio-Valle. Dept. Chemical Engineering and Materials Science, ETSI. Campus de “El Carmen”. Universidad de Huelva. 21071 Huelva. Spain.  
e-mail: [josefernando.rubio@diq.uhu.es](mailto:josefernando.rubio@diq.uhu.es)

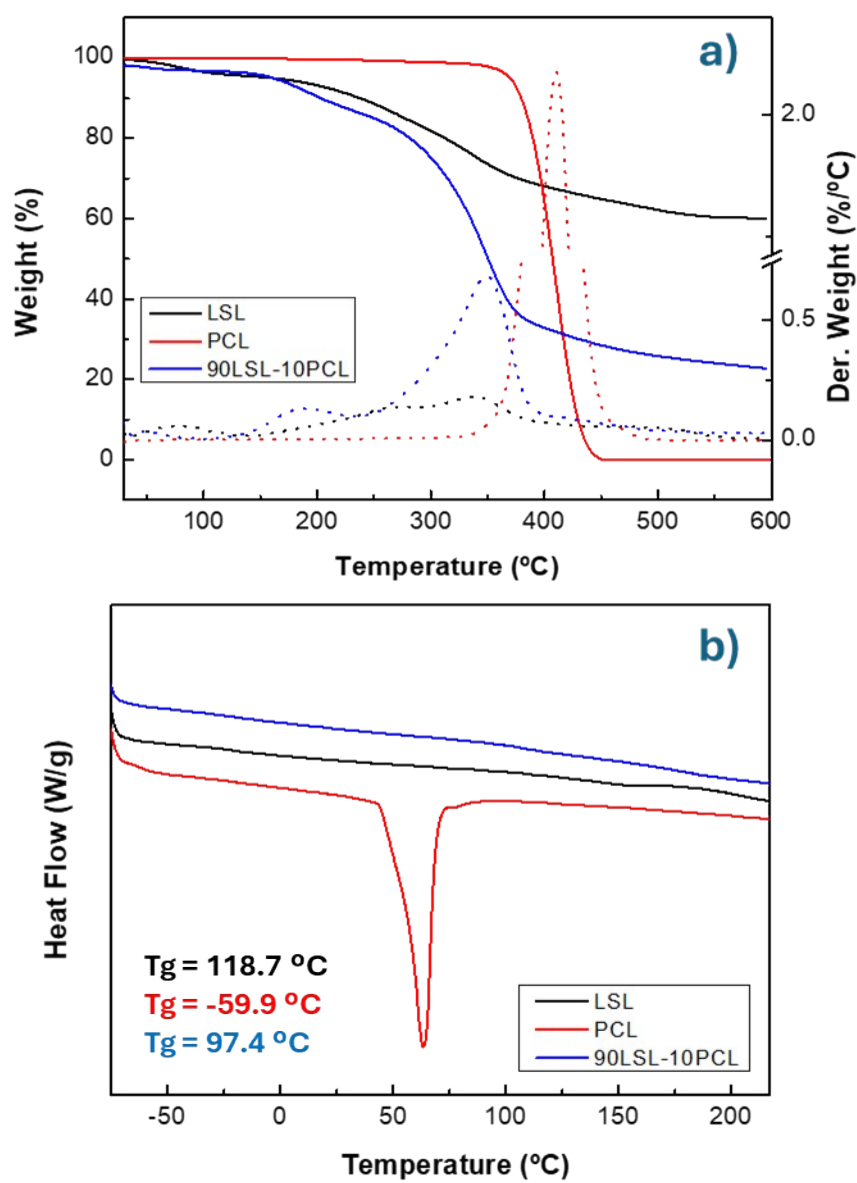

**Figure S1.** a) TGA curves and b) DSC thermograms of LSL, PCL, and the reference nanostructure 90LSL-10PCL, with the glass transition temperatures ( $T_g$ ) indicated.
